# Supplementary material for: Antioxidative Indenone and Benzophenone Derivatives from the Mangrove-Derived Fungus Cytospora heveae NSHSJ-2
Source: MDPI journal article supplement (doi:10.3390/md21030181), 2023-03-14
Supplement: s1 [file s1]

## Supporting information

### **Antioxidative indenone and benzophenone derivatives from the Mangrove-Derived Fungus *Cytospora heveae* NSHSJ-2**

Ge Zou <sup>1</sup>, Taobo Li <sup>1</sup>, Wencong Yang <sup>1</sup>, Bing Sun <sup>1</sup>, Yan Chen <sup>1</sup>, Bo Wang <sup>1</sup>, Yanghui Ou <sup>2</sup>,  
Huijuan Yu <sup>2,\*</sup>, and Zhigang She <sup>1,\*</sup>

1 School of Chemistry, Sun Yat-Sen University, Guangzhou 510275, China;

2 Guangdong Key Laboratory of Animal Conservation and Resource Utilization,  
Guangdong Public Laboratory of Wild Animal Conservation and Utilization, Institute  
of Zoology, Guangdong Academy of Sciences, Guangzhou 510260, China.

\* Correspondence: yuhj@giz.gd.cn(H.Y); cessshzhg@mail.sysu.edu.cn (Z.S.)

## Supporting information

**Figure S1.** HRESIMS spectrum of compound **1**.

**Figure S2.**  $^1\text{H}$  NMR spectrum of compound **1** (400 MHz, Acetone- $d_6$ ).

**Figure S3.**  $^{13}\text{C}$  NMR spectrum of compound **1** (100 MHz, Acetone- $d_6$ ).

**Figure S4.**  $^1\text{H}$ - $^1\text{H}$  COSY spectrum of compound **1**.

**Figure S5.** HSQC spectrum of compound **1**.

**Figure S6.** HMBC spectrum of compound **1**.

**Figure S7.** HRESIMS spectrum of compound **2**.

**Figure S8.**  $^1\text{H}$  NMR spectrum of compound **2** (400 MHz,  $\text{CDCl}_3$ ).

**Figure S9.**  $^{13}\text{C}$  NMR spectrum of compound **2** (100 MHz,  $\text{CDCl}_3$ ).

**Figure S10.**  $^1\text{H}$ - $^1\text{H}$  COSY spectrum of compound **2**.

**Figure S11.** HSQC spectrum of compound **2**.

**Figure S12.** HMBC spectrum of compound **2**.

**Figure S13.** HRESIMS spectrum of compound **3**.

**Figure S14.**  $^1\text{H}$  NMR spectrum of compound **3** (600 MHz,  $\text{CD}_3\text{OD}$ ).

**Figure S15.**  $^{13}\text{C}$  NMR spectrum of compound **3** (150 MHz,  $\text{CD}_3\text{OD}$ ).

**Figure S16.**  $^1\text{H}$ - $^1\text{H}$  COSY spectrum of compound **3**.

**Figure S17.** HSQC spectrum of compound **3**.

**Figure S18.** HMBC spectrum of compound **3**.

**Figure S19.** HRESIMS spectrum of compound **4**.

**Figure S20.**  $^1\text{H}$  NMR spectrum of compound **4** (600 MHz,  $\text{CD}_3\text{OD}$ ).

**Figure S21.**  $^{13}\text{C}$  NMR spectrum of compound **4** (150 MHz,  $\text{CD}_3\text{OD}$ ).

**Figure S22.**  $^1\text{H}$ - $^1\text{H}$  COSY spectrum of compound **4**.

**Figure S23.** HSQC spectrum of compound **4**.

**Figure S24.** HMBC spectrum of compound **4**.

**Figure S25.** HRESIMS spectrum of compound **6**.

**Figure S26.**  $^1\text{H}$  NMR spectrum of compound **6** (400 MHz,  $\text{CD}_3\text{OD}$ ).

**Figure S27.**  $^{13}\text{C}$  NMR spectrum of compound **6** (100 MHz,  $\text{CD}_3\text{OD}$ ).

**Figure S28.**  $^1\text{H}$ - $^1\text{H}$  COSY spectrum of compound **6**.

**Figure S29.** HSQC spectrum of compound **6**.

**Figure S30.** HMBC spectrum of compound **6**.

**Figure S31.** HRESIMS spectrum of compound **7**.

**Figure S32.**  $^1\text{H}$  NMR spectrum of compound **7** (400 MHz,  $\text{CD}_3\text{OD}$ ).

**Figure S33.**  $^{13}\text{C}$  NMR spectrum of compound **7** (100 MHz,  $\text{CD}_3\text{OD}$ ).

**Figure S34.**  $^1\text{H}$ - $^1\text{H}$  COSY spectrum of compound **7**.

**Figure S35.** HSQC spectrum of compound **7**.

**Figure S36.** HMBC spectrum of compound **7**.

**Figure S37.** ECD spectrum of compound (+)-**7**.

**Figure S38.** ECD spectrum of compound (–)-**7**.

**Figure S39.** Structure of compounds

3,4-dihydro-4 $\beta$ ,6-dihydroxy-5-methoxy-2 $\alpha$ -methyl-1(2*H*)-naphthalenone,  
(4*S*)-4,8-dihydroxy- $\alpha$ -tetralone, (4*R*)-4,8-dihydroxy- $\alpha$ -tetralone,  
(4*S*)-5-hydroxy-4-methoxy- $\alpha$ -tetralone and (4*R*)-5-hydroxy-4-methoxy- $\alpha$ -tetralone.

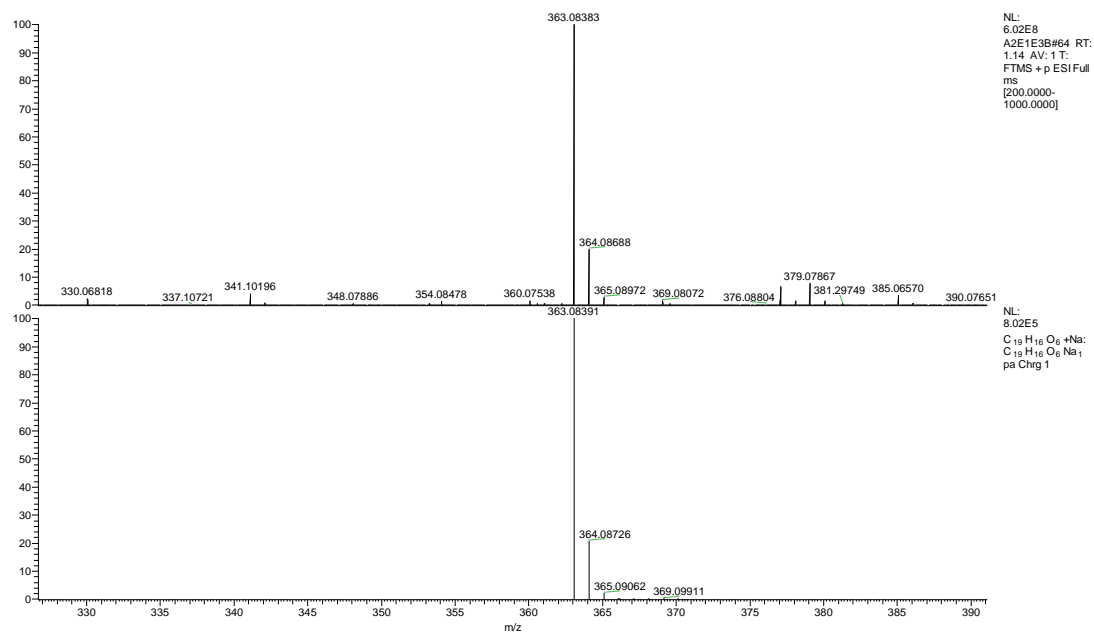

**Figure S1.** HRESIMS spectrum of compound **1**.

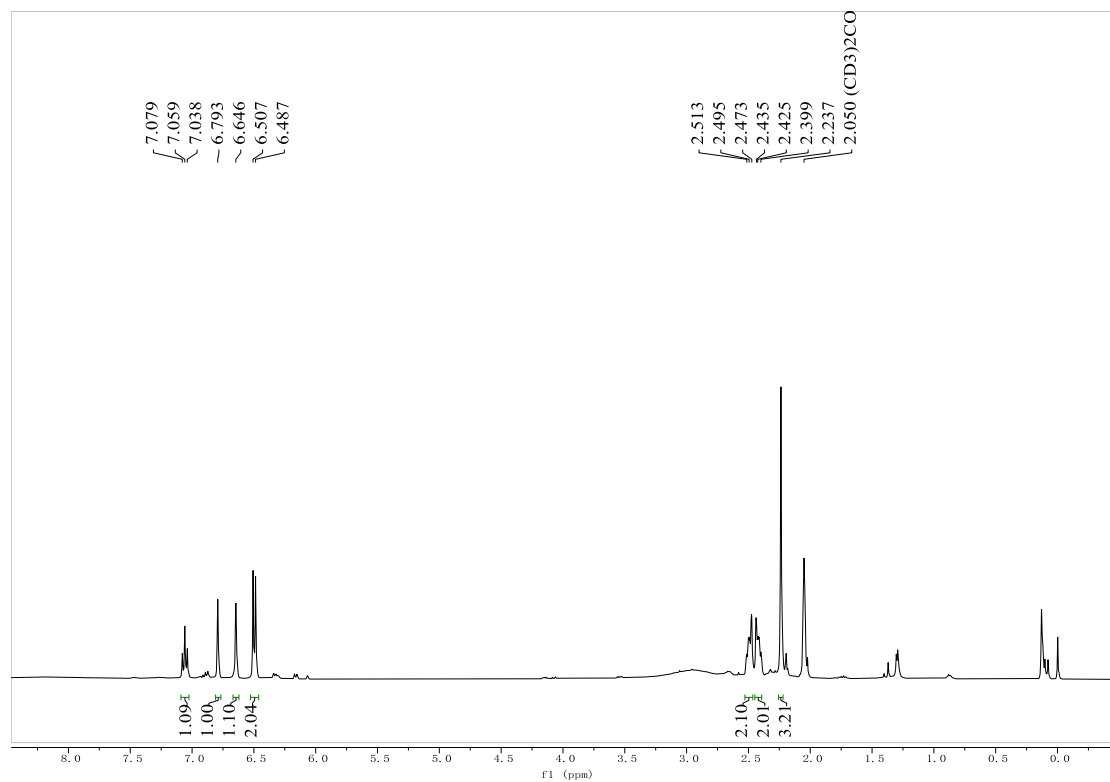

**Figure S2.** <sup>1</sup>H NMR spectrum of compound **1** (400 MHz, Acetone-*d*<sub>6</sub>).

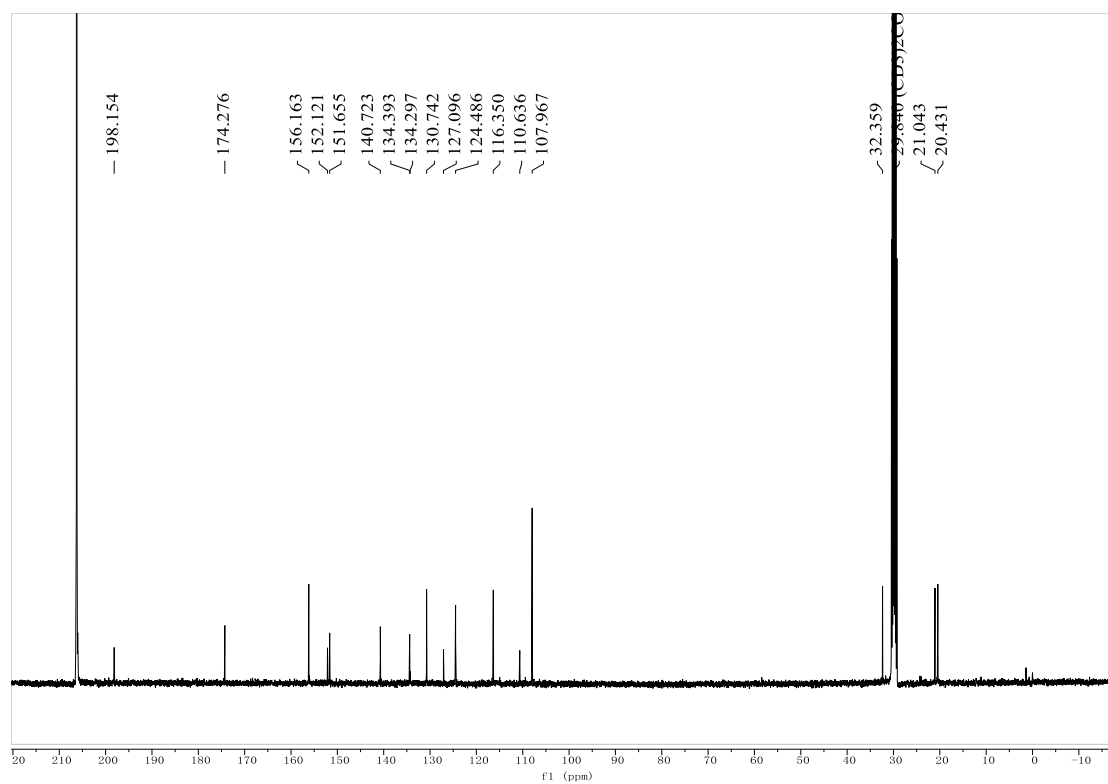

**Figure S3.**  $^{13}\text{C}$  NMR spectrum of compound **1** (100 MHz, Actone- $d_6$ ).

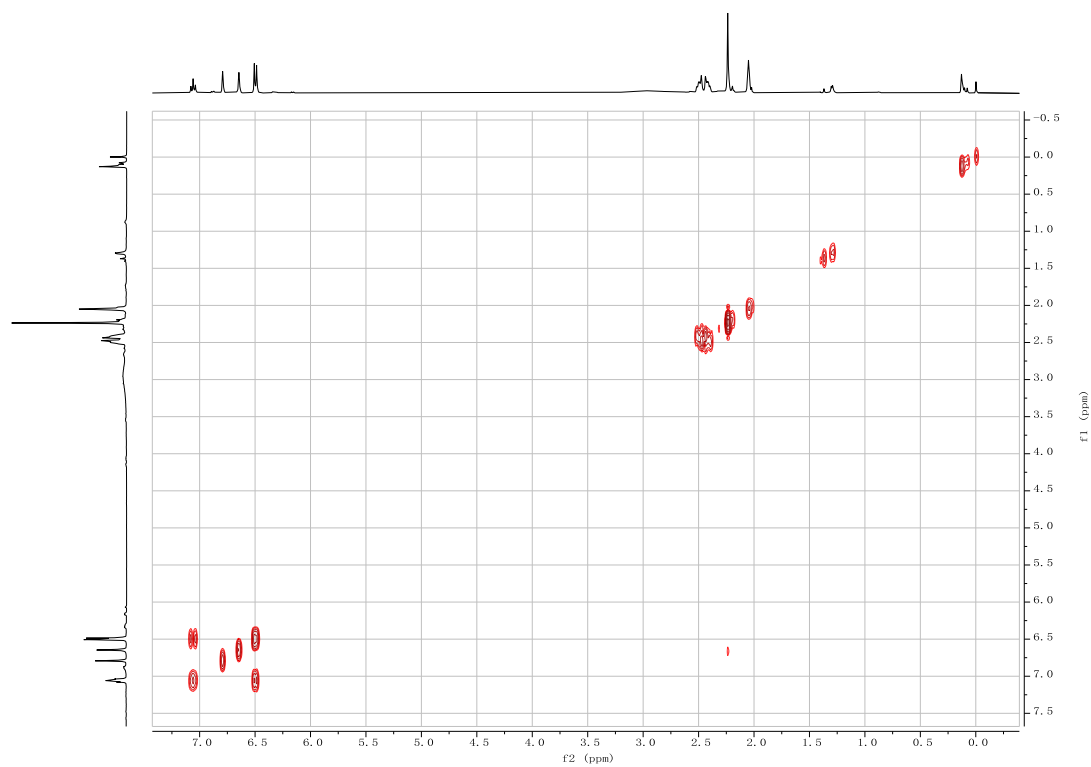

**Figure S4.**  $^1\text{H}$ - $^1\text{H}$  COSY spectrum of compound **1**.

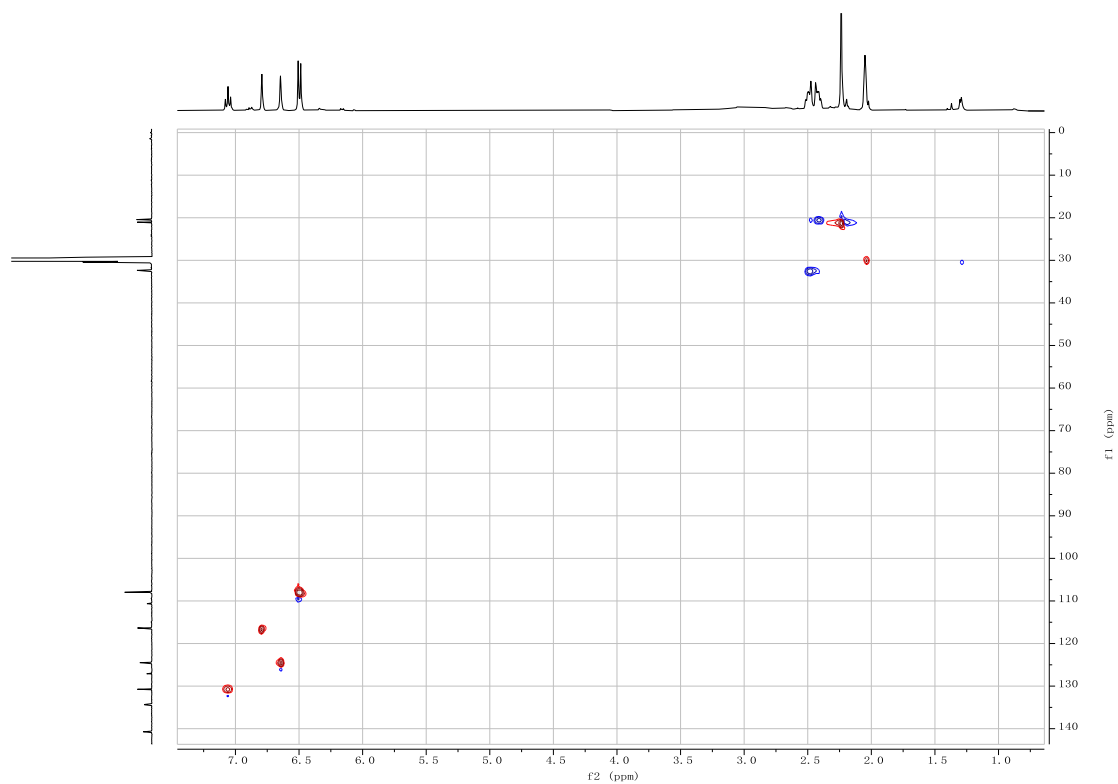

**Figure S5.** HSQC spectrum of compound **1**.

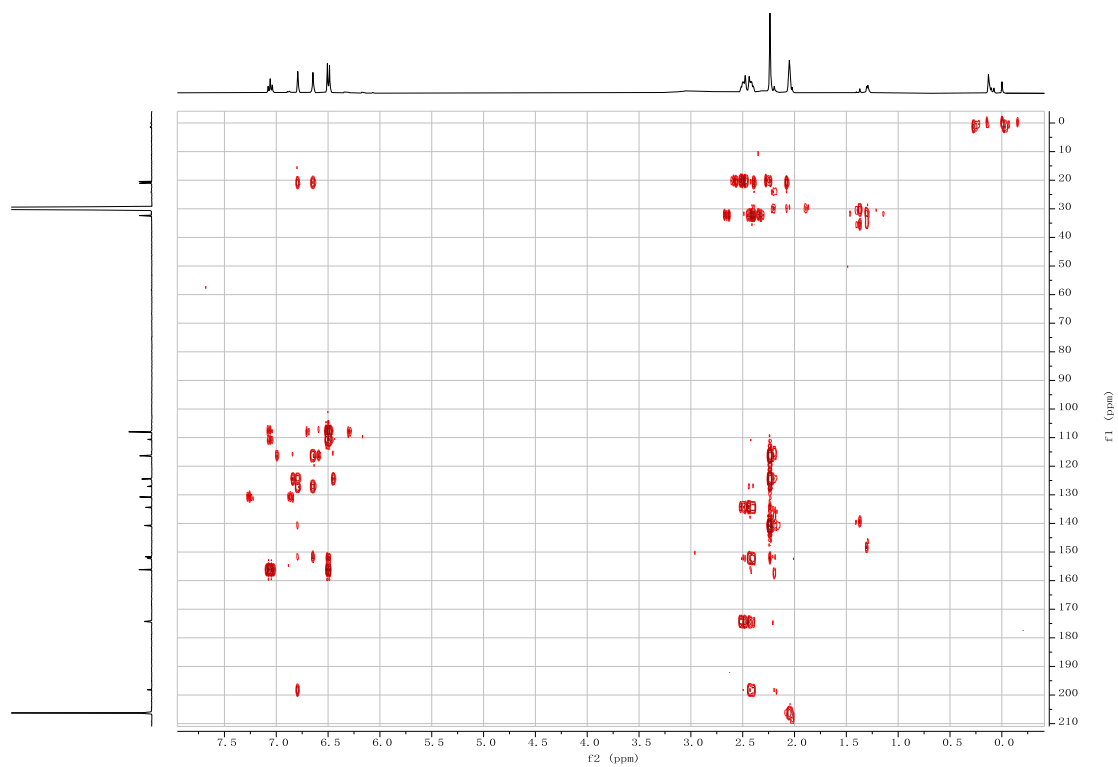

**Figure S6.** HMBC spectrum of compound **1**.

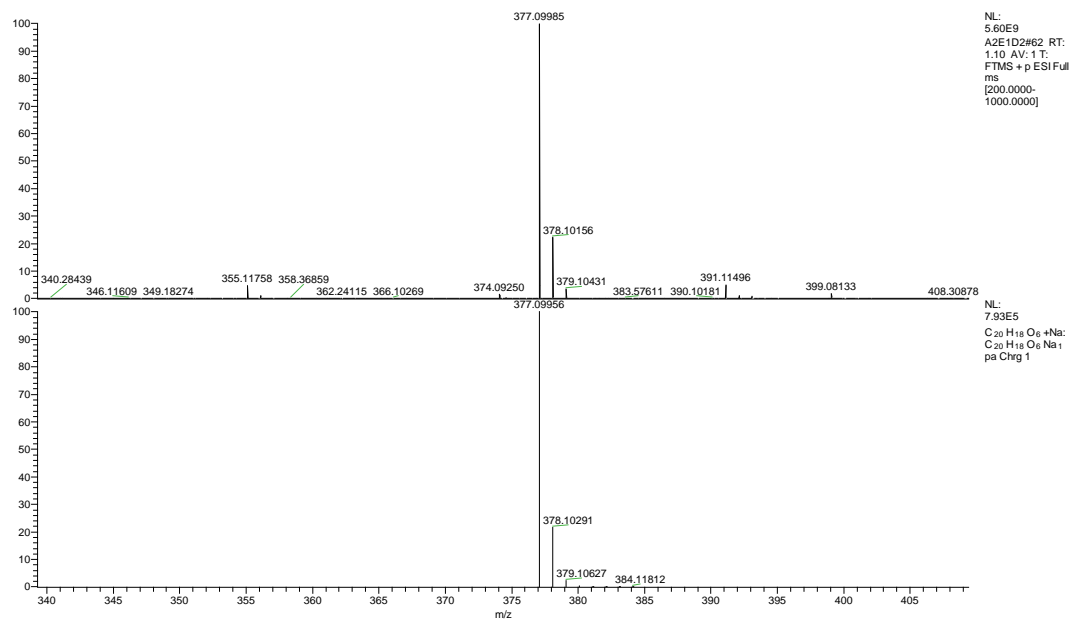

**Figure S7.** HRESIMS spectrum of compound **2**.

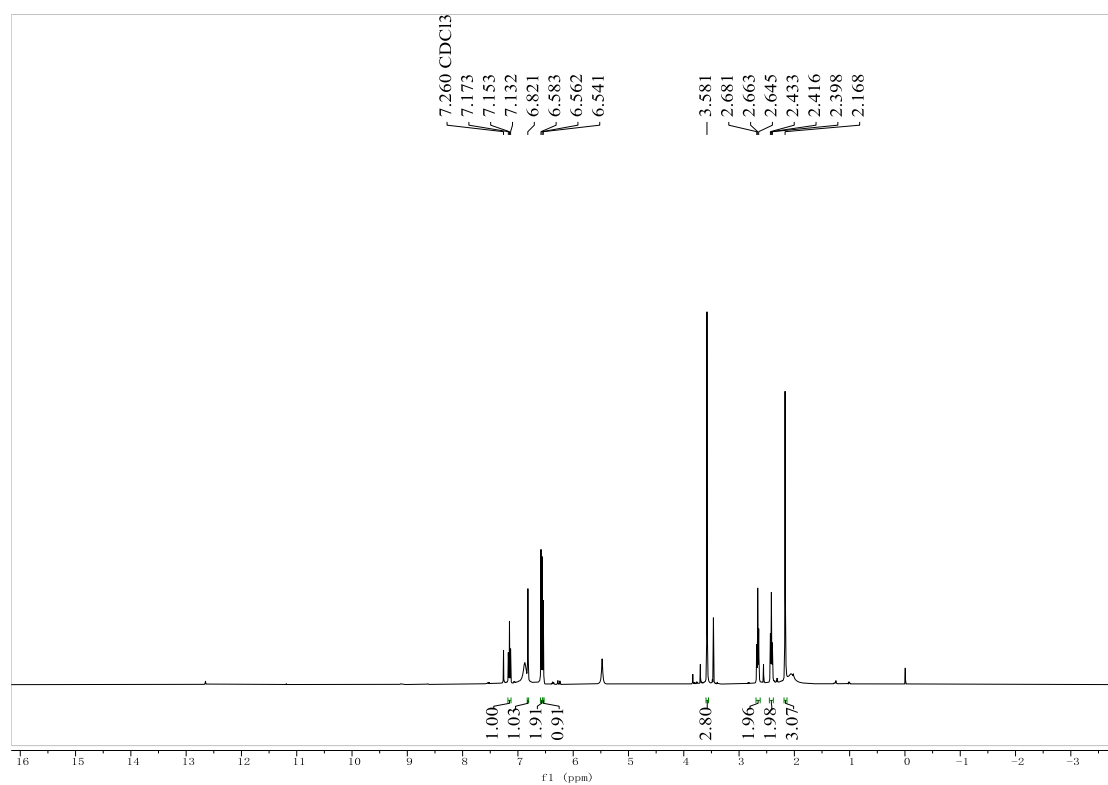

**Figure S8.**  $^1\text{H}$  NMR spectrum of compound **2** (400 MHz,  $\text{CDCl}_3$ ).

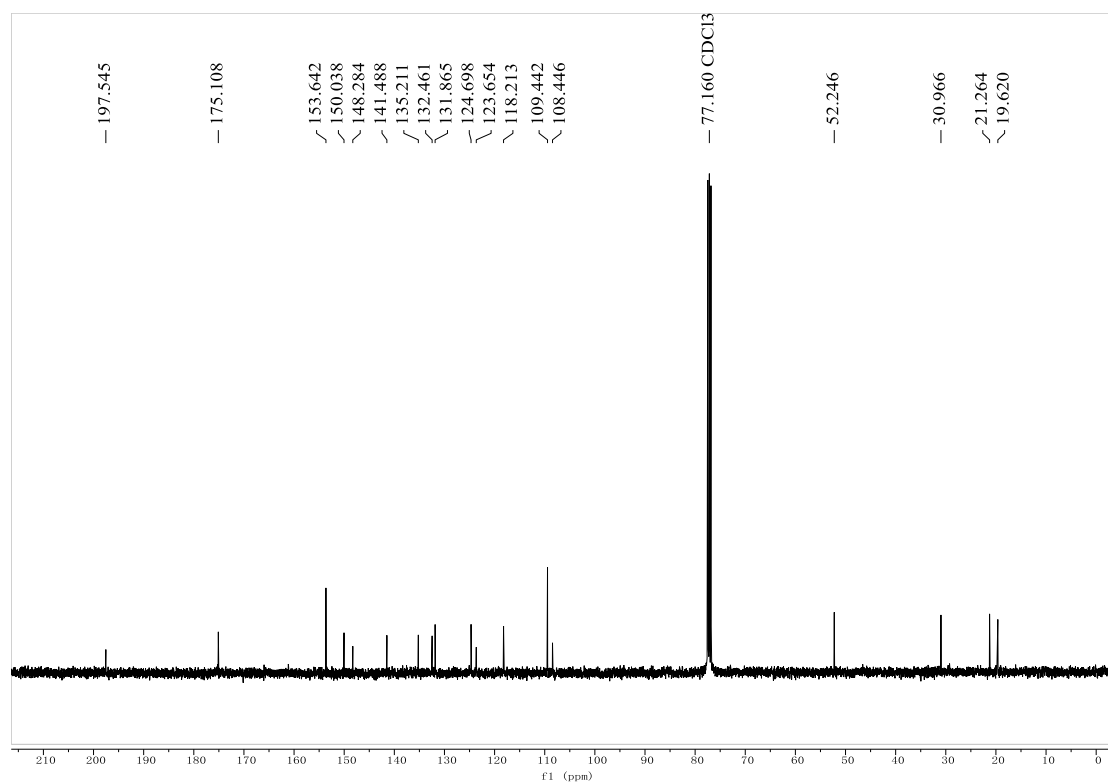

**Figure S9.**  $^{13}\text{C}$  NMR spectrum of compound 2 (100 MHz,  $\text{CDCl}_3$ ).

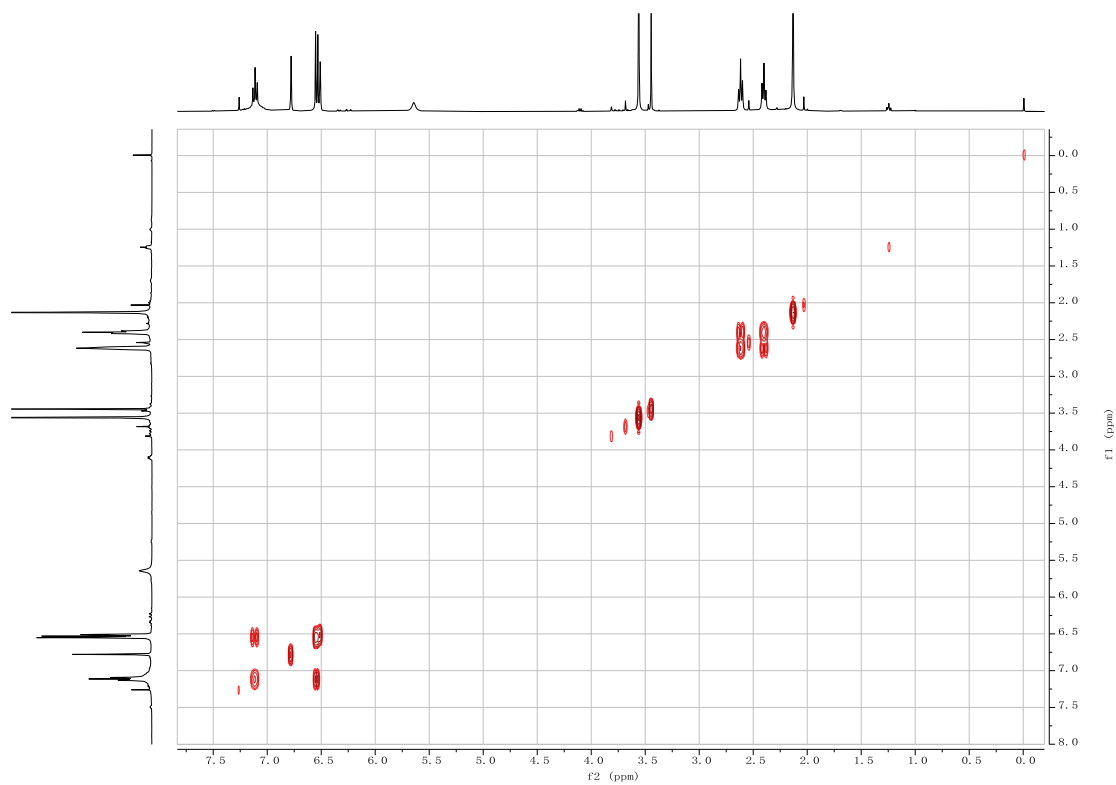

**Figure S10.**  $^1\text{H}$ - $^1\text{H}$  COSY spectrum of compound 2.



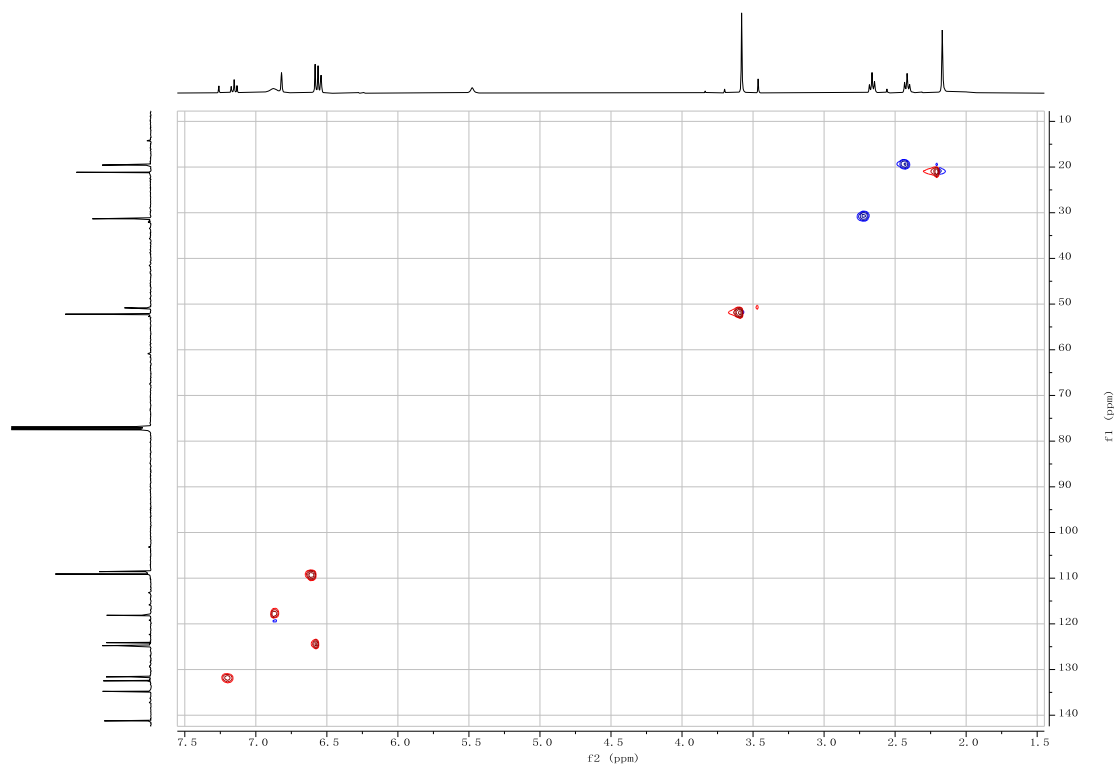

**Figure S11.** HSQC spectrum of compound **2**.

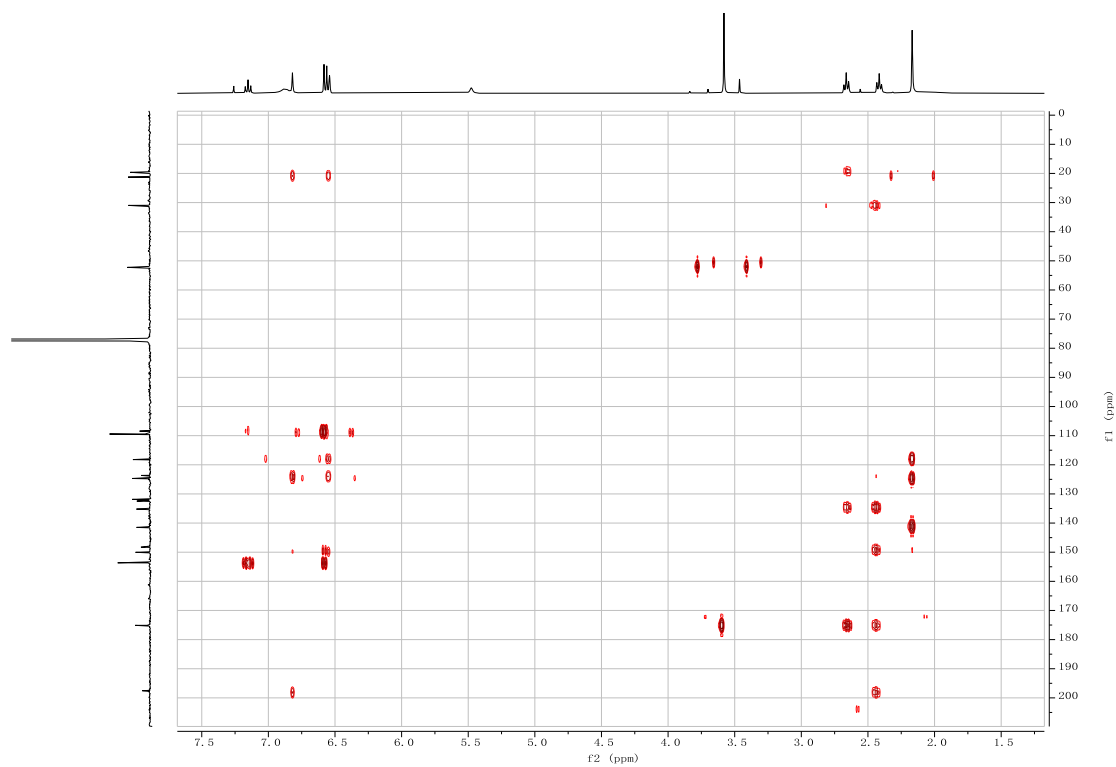

**Figure S12.** HMBC spectrum of compound **2**.

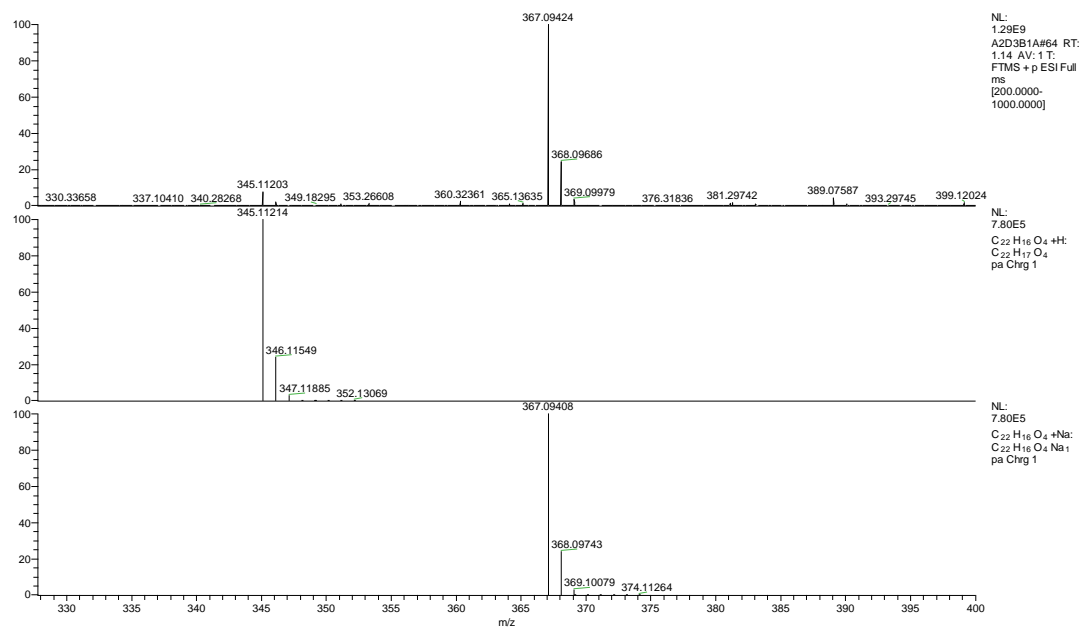

**Figure S13.** HRESIMS spectrum of compound **3**.

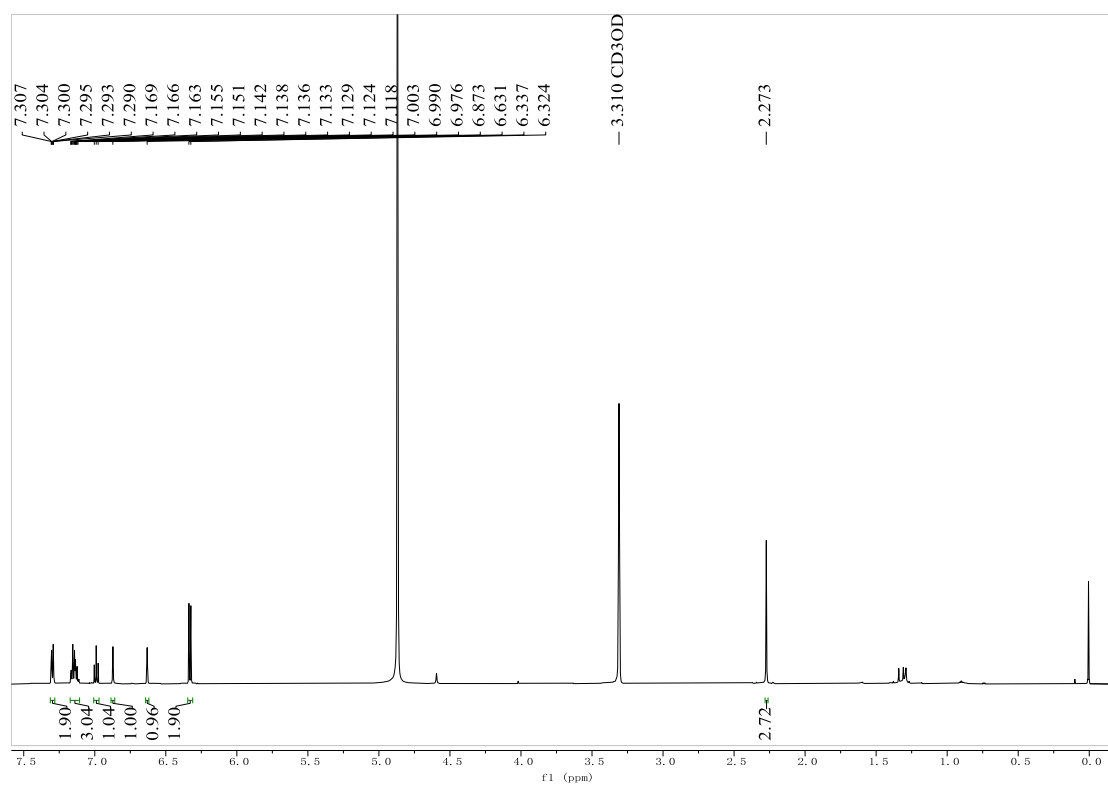

**Figure S14.** <sup>1</sup>H NMR spectrum of compound **3** (600 MHz, CD<sub>3</sub>OD).

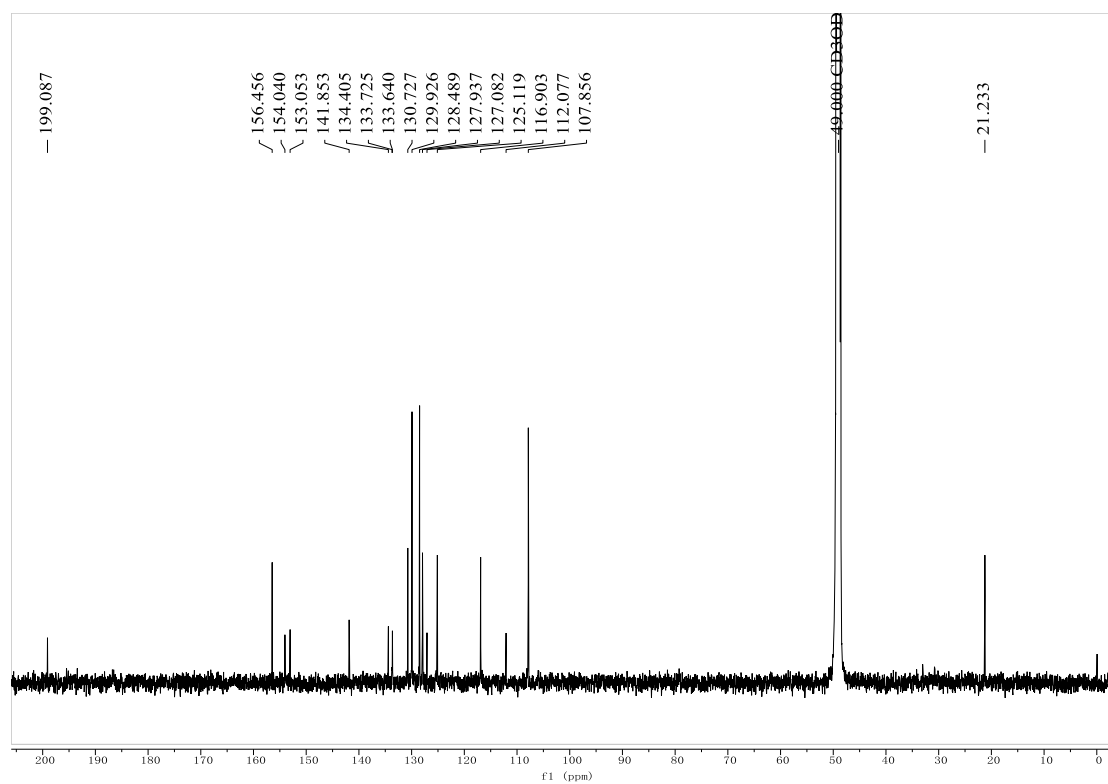

**Figure S15.**  $^{13}\text{C}$  NMR spectrum of compound **3** (150 MHz, CD<sub>3</sub>OD).

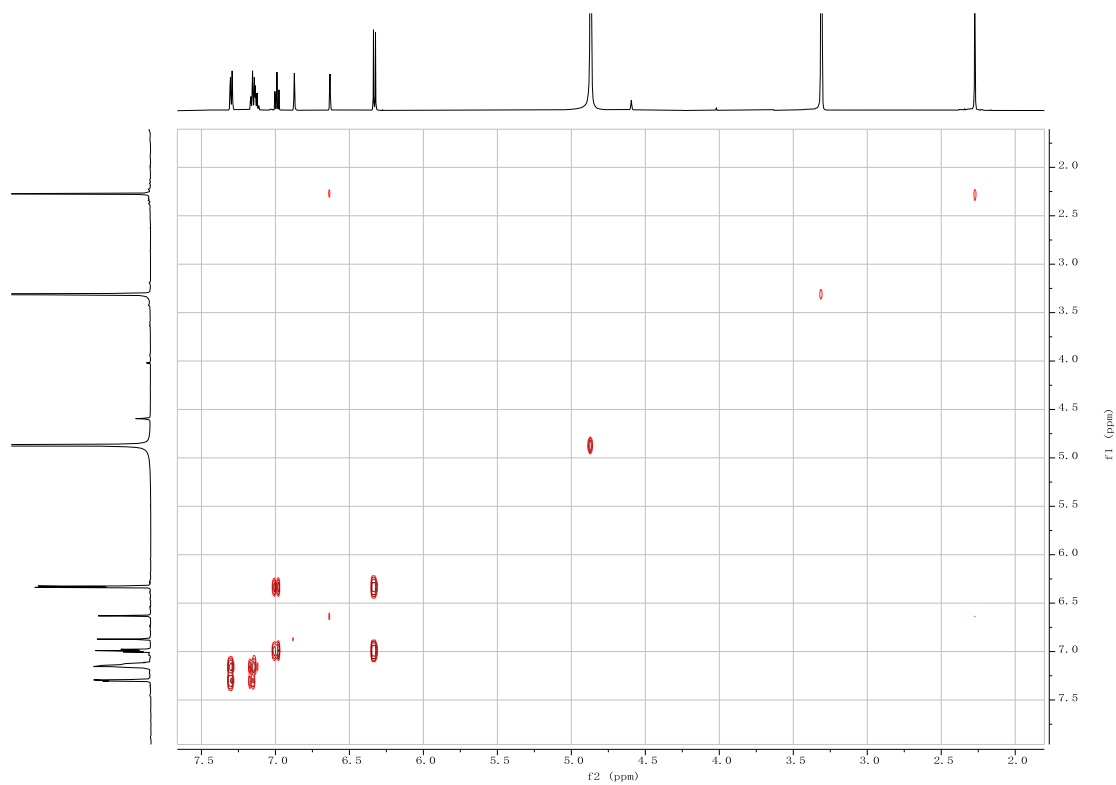

**Figure S16.**  $^1\text{H}$ - $^1\text{H}$  COSY spectrum of compound **3**.

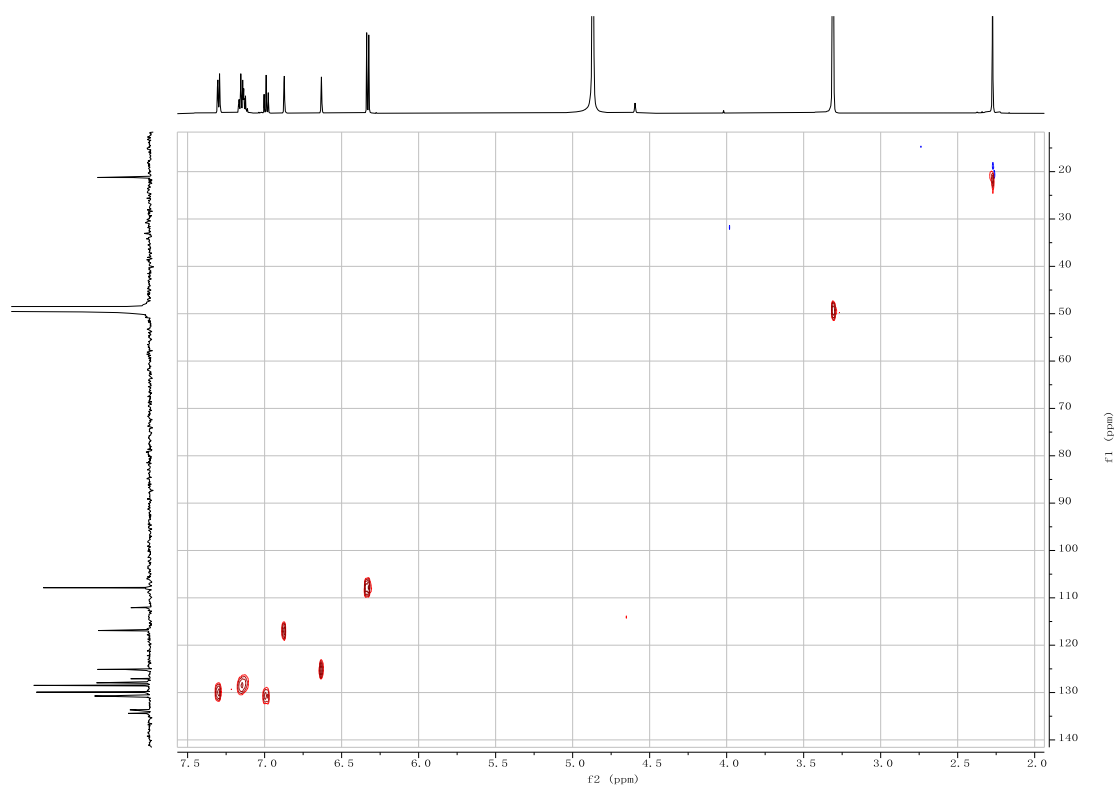

**Figure S17.** HSQC spectrum of compound **3**.

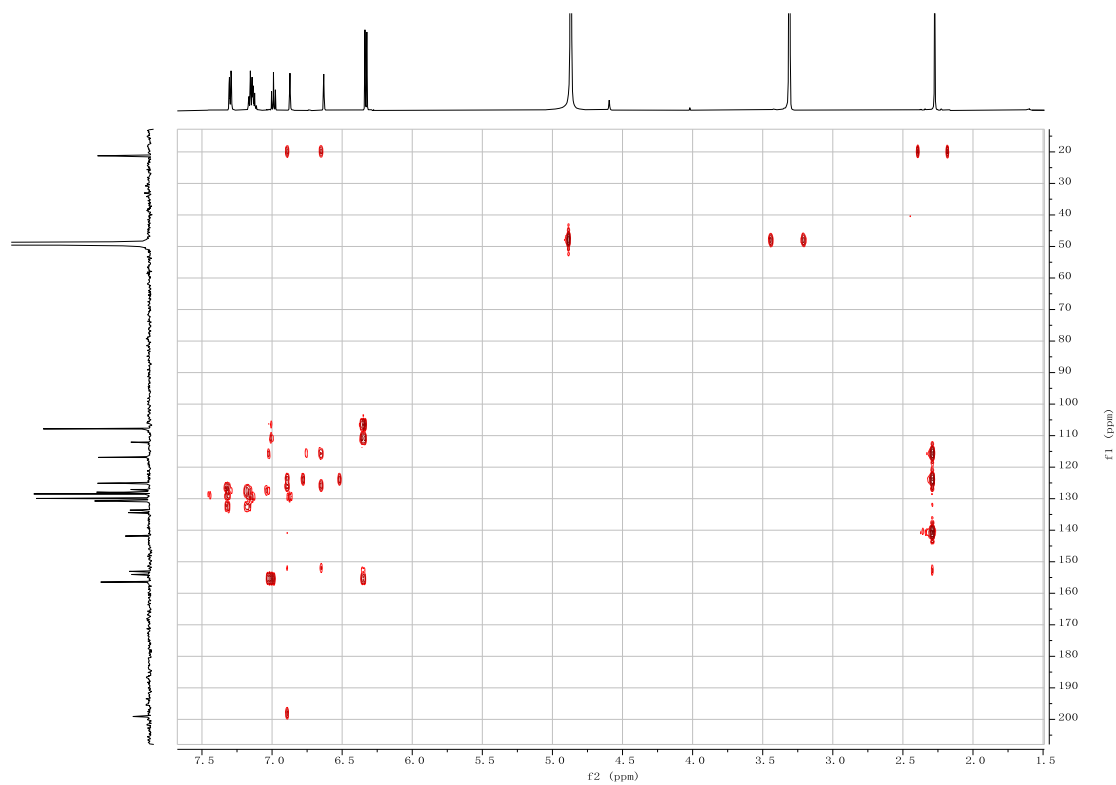

**Figure S18.** HMBC spectrum of compound **3**.

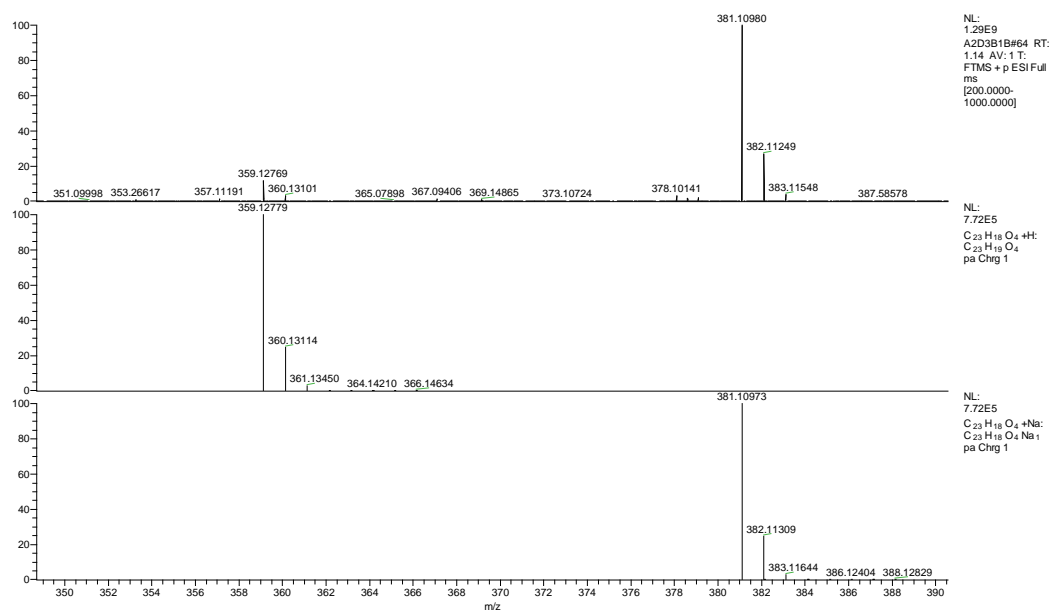

**Figure S19.** HRESIMS spectrum of compound **4**.

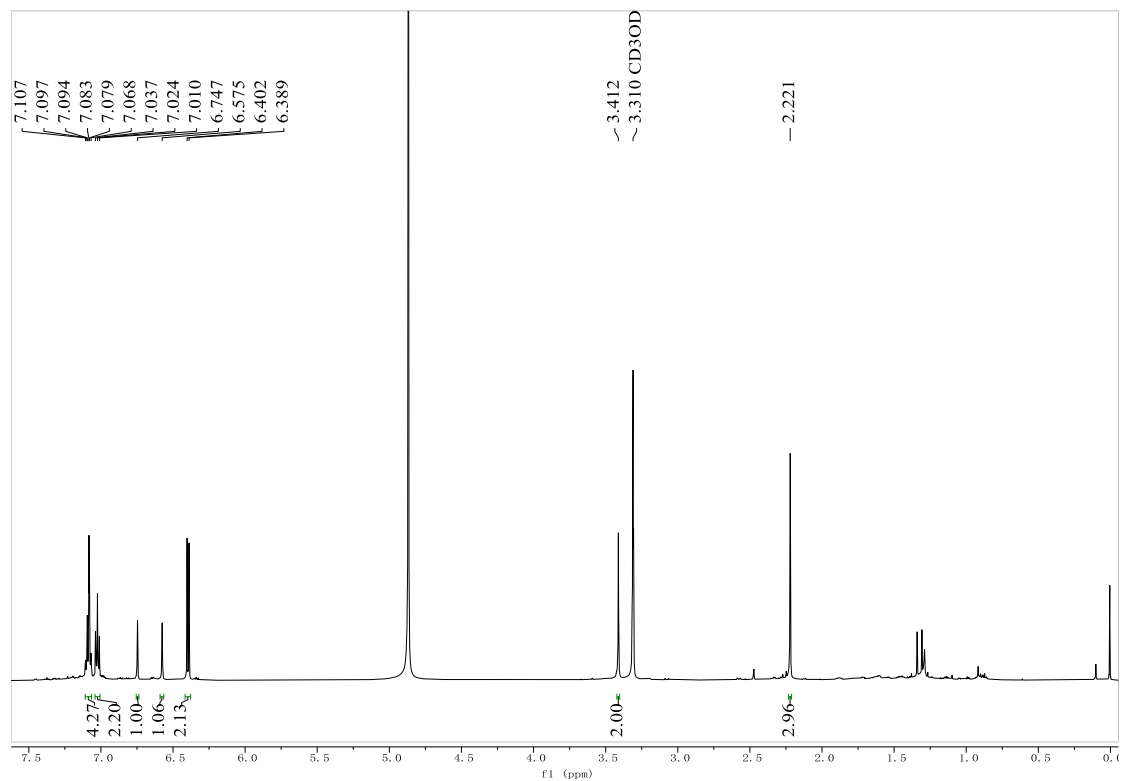

**Figure S20.** <sup>1</sup>H NMR spectrum of compound **4** (600 MHz, CD<sub>3</sub>OD).

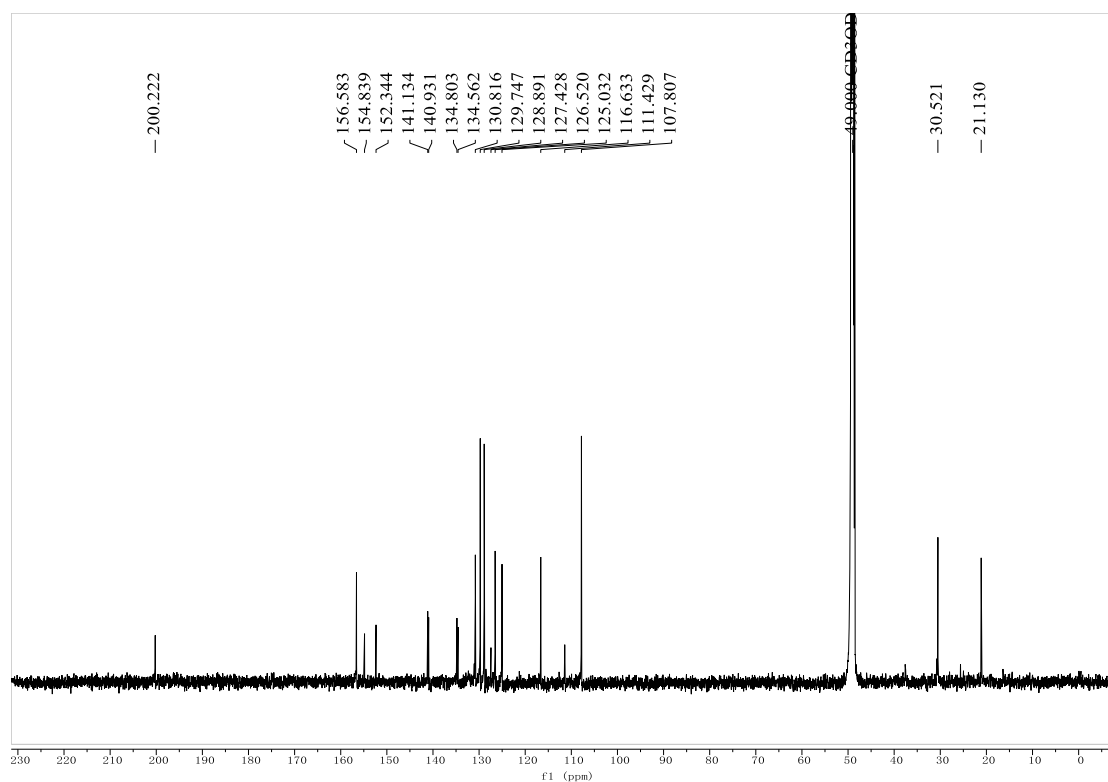

**Figure S21.**  $^{13}\text{C}$  NMR spectrum of compound **4** (150 MHz, CD<sub>3</sub>OD).

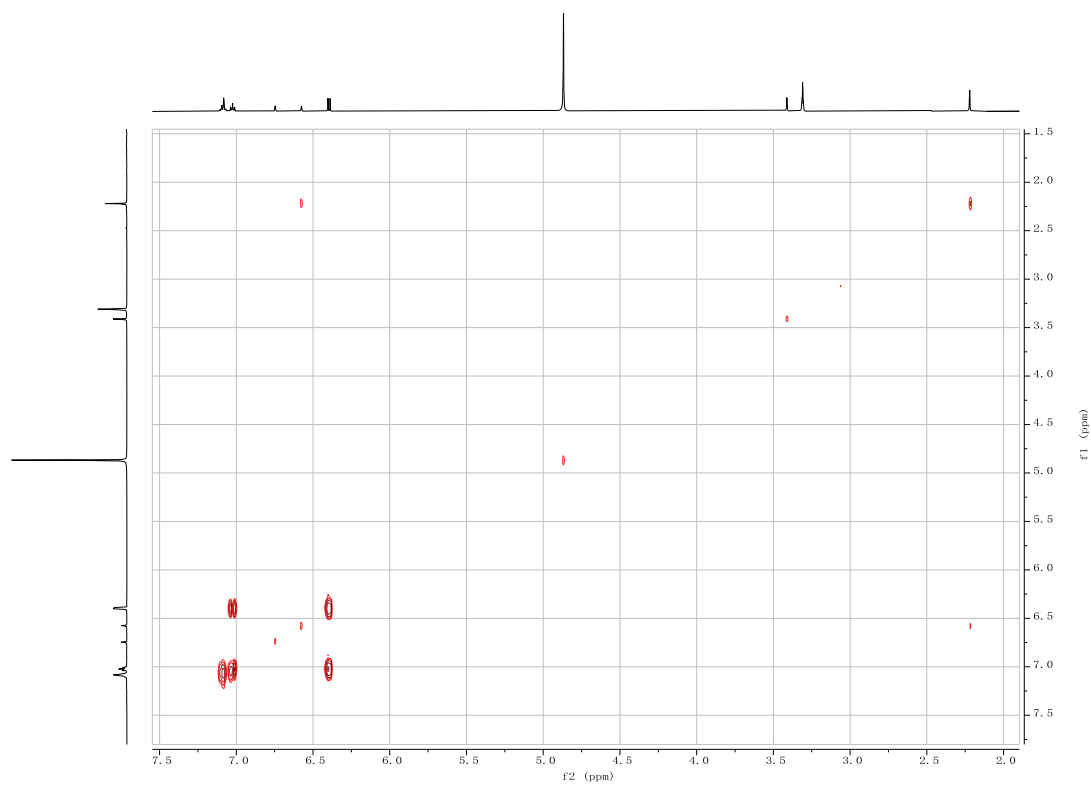

**Figure S22.**  $^1\text{H}$ - $^1\text{H}$  COSY spectrum of compound **4**.

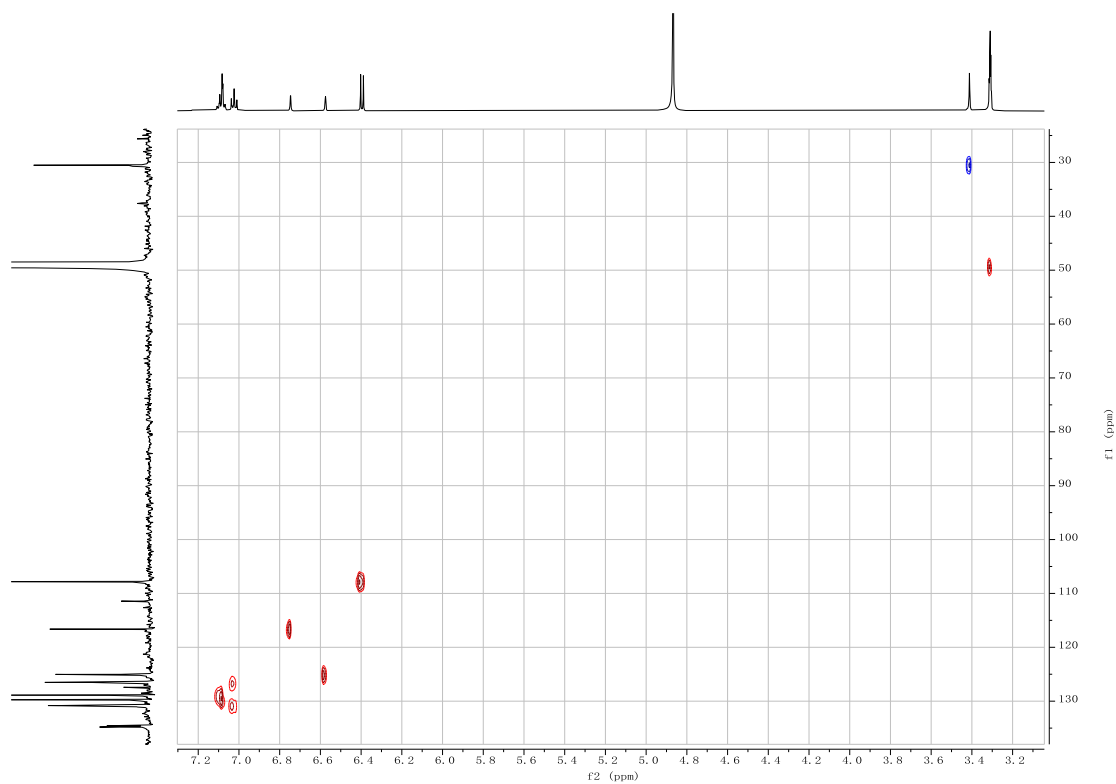

**Figure S23.** HSQC spectrum of compound **4**.

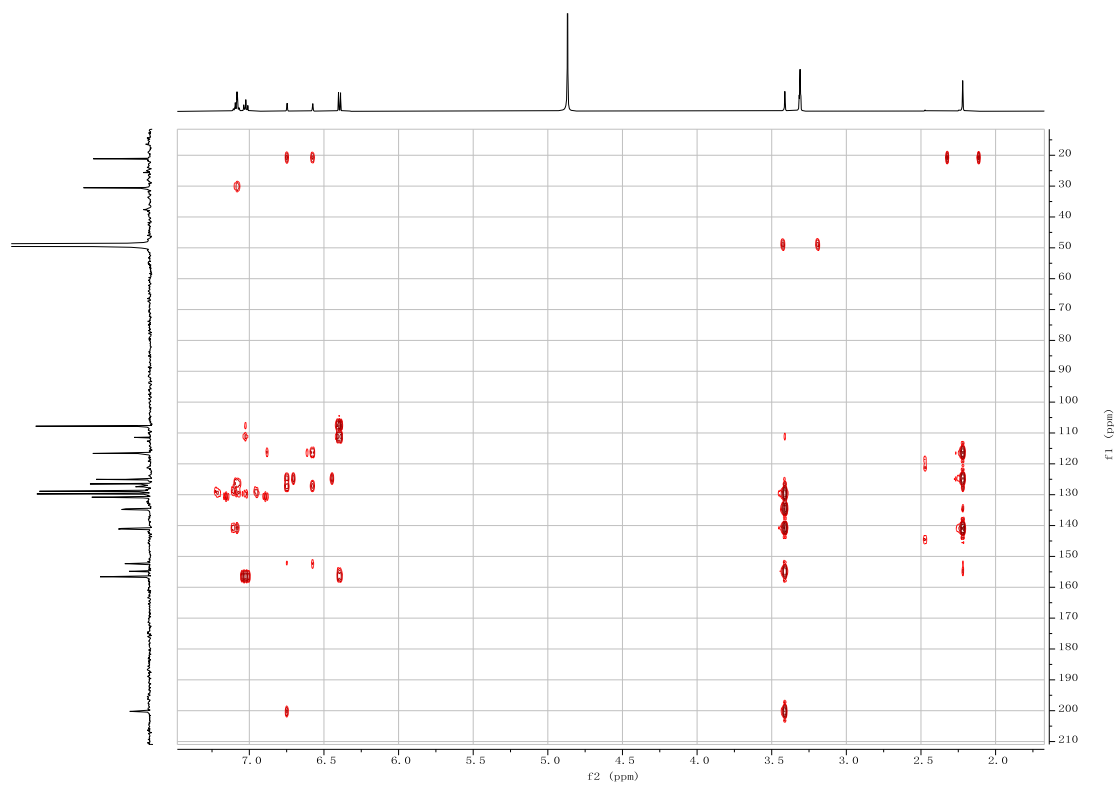

**Figure S24.** HMBC spectrum of compound **4**.

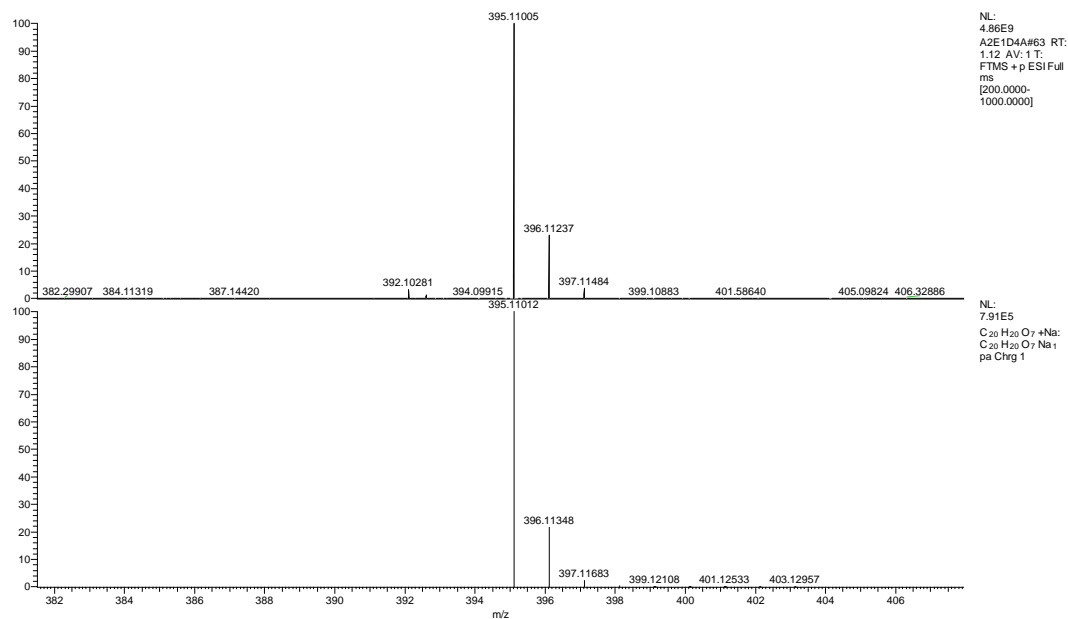

**Figure S25.** HRESIMS spectrum of compound **6**.

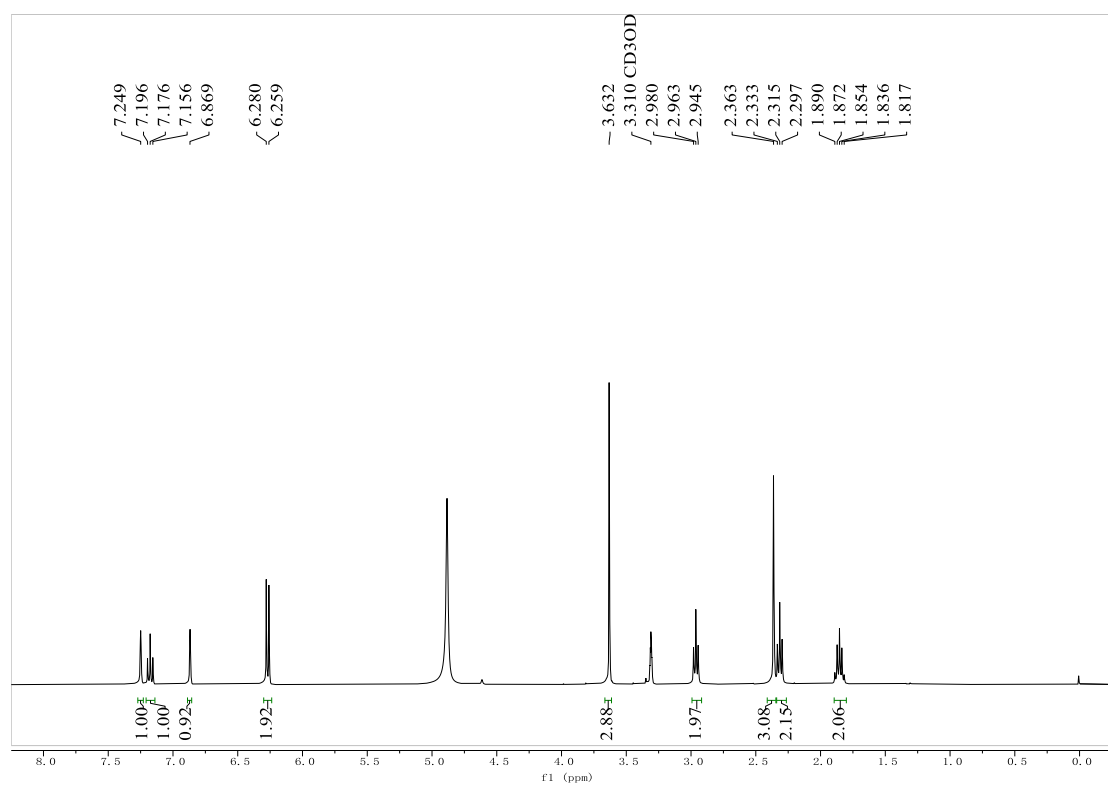

**Figure S26.**  $^1\text{H}$  NMR spectrum of compound **6** (400 MHz,  $\text{CD}_3\text{OD}$ ).



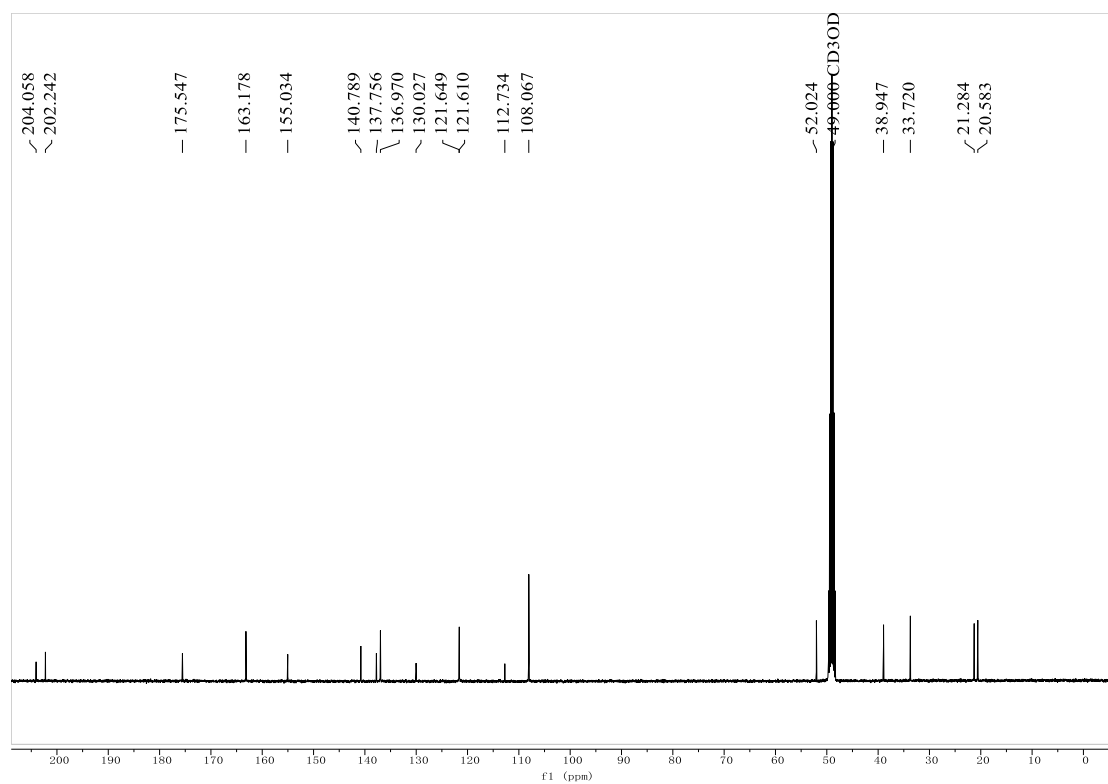

**Figure S27.**  $^{13}\text{C}$  NMR spectrum of compound **6** (100 MHz,  $\text{CD}_3\text{OD}$ ).

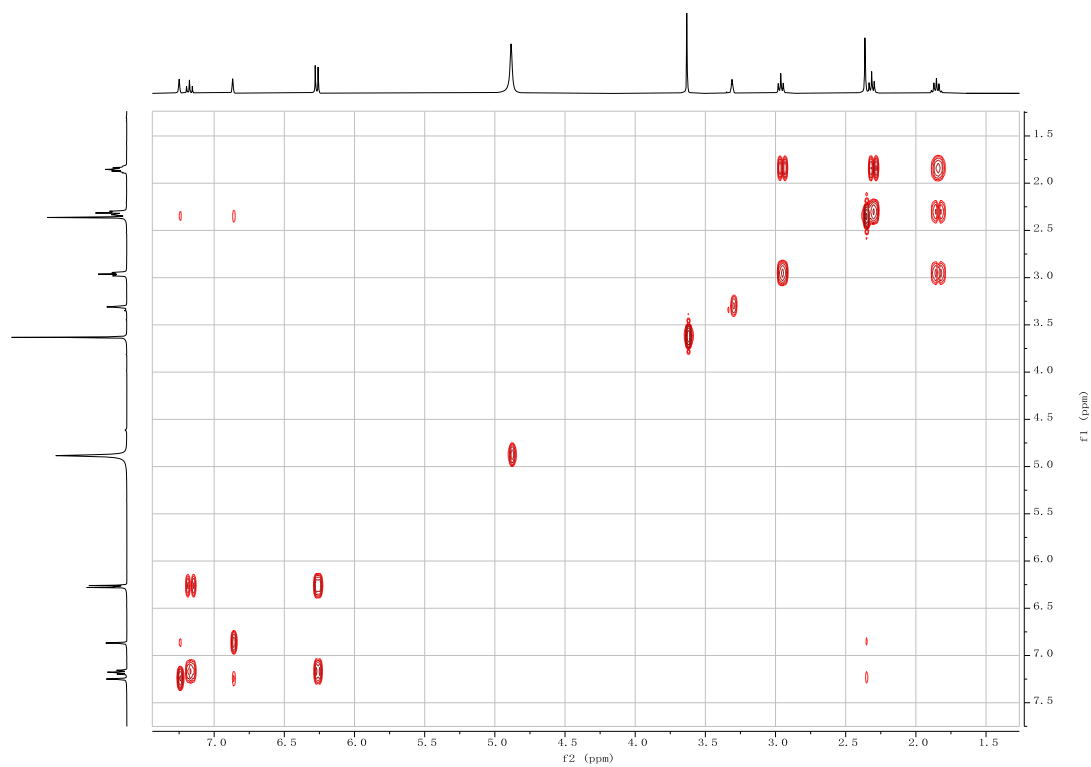

**Figure S28.**  $^1\text{H}$ - $^1\text{H}$  COSY spectrum of compound **6**.

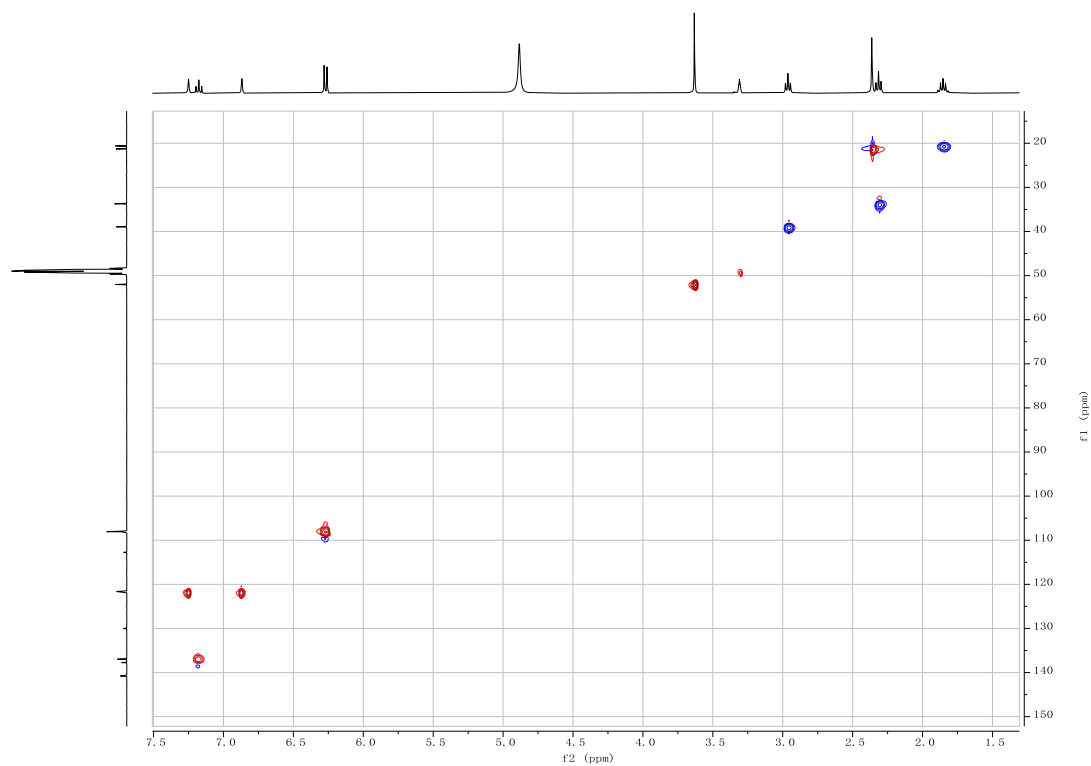

**Figure S29.** HSQC spectrum of compound **6**.

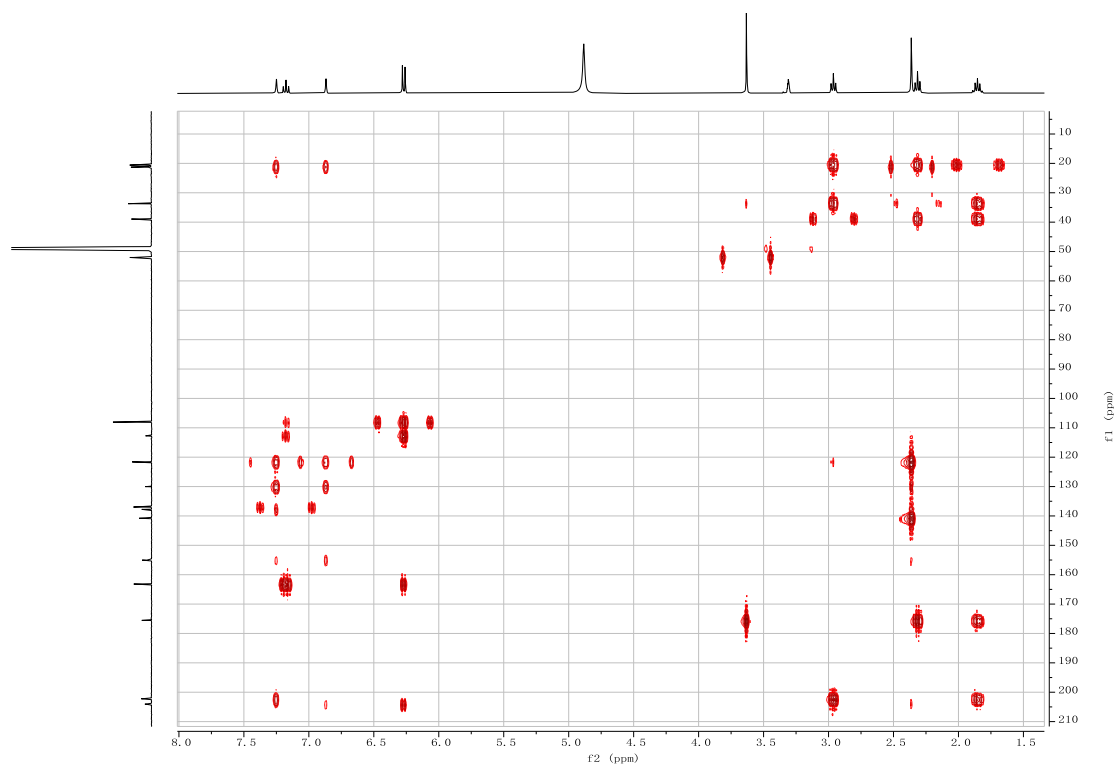

**Figure S30.** HMBC spectrum of compound **6**.

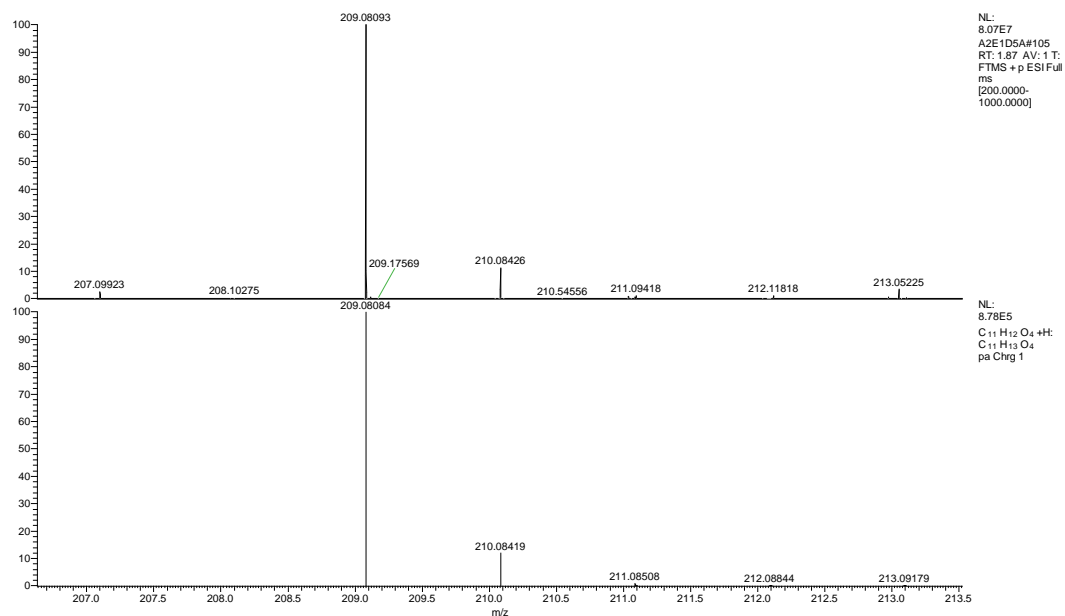

**Figure S31.** HRESIMS spectrum of compound **7**.

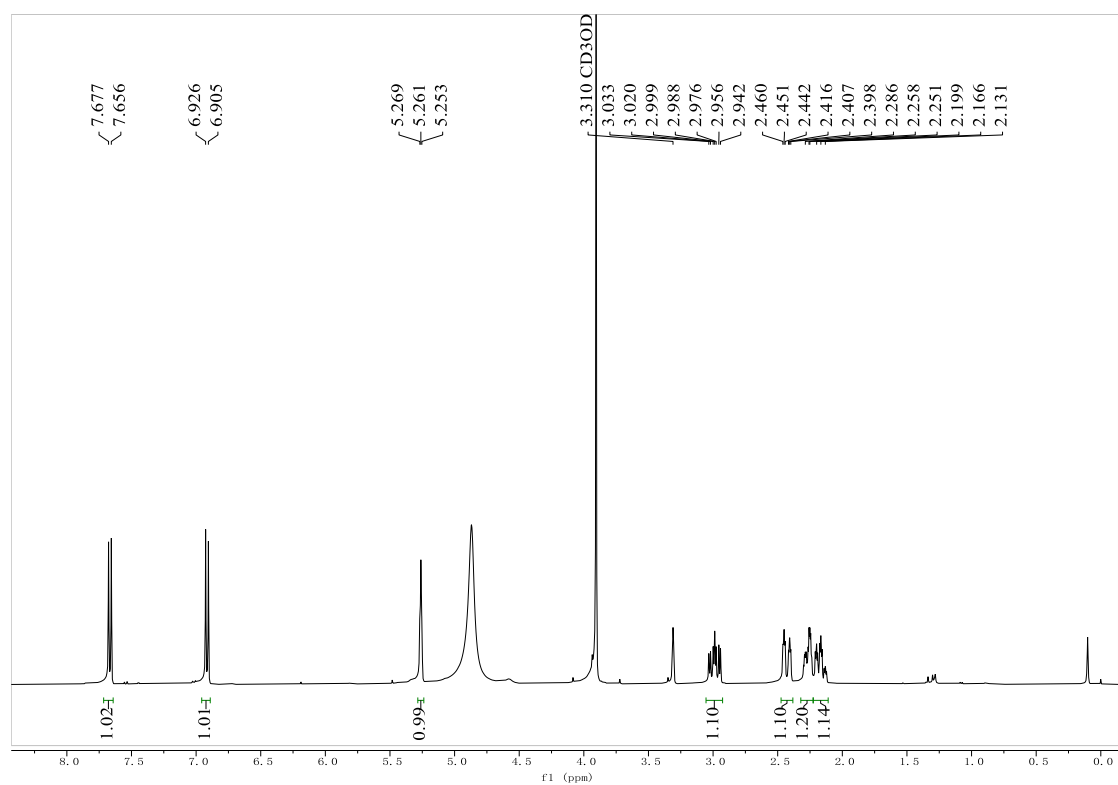

**Figure S32.**  $^1\text{H}$  NMR spectrum of compound **7** (400 MHz,  $\text{CD}_3\text{OD}$ ).

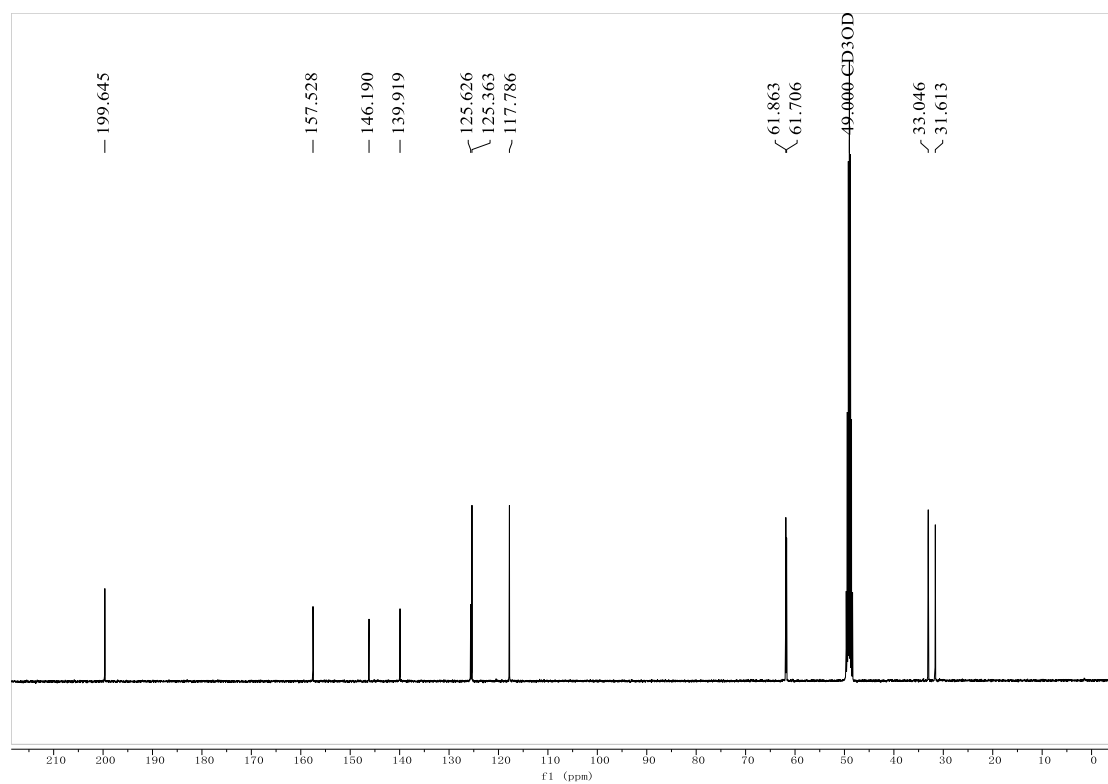

**Figure S33.**  $^{13}\text{C}$  NMR spectrum of compound **7** (100 MHz,  $\text{CD}_3\text{OD}$ ).

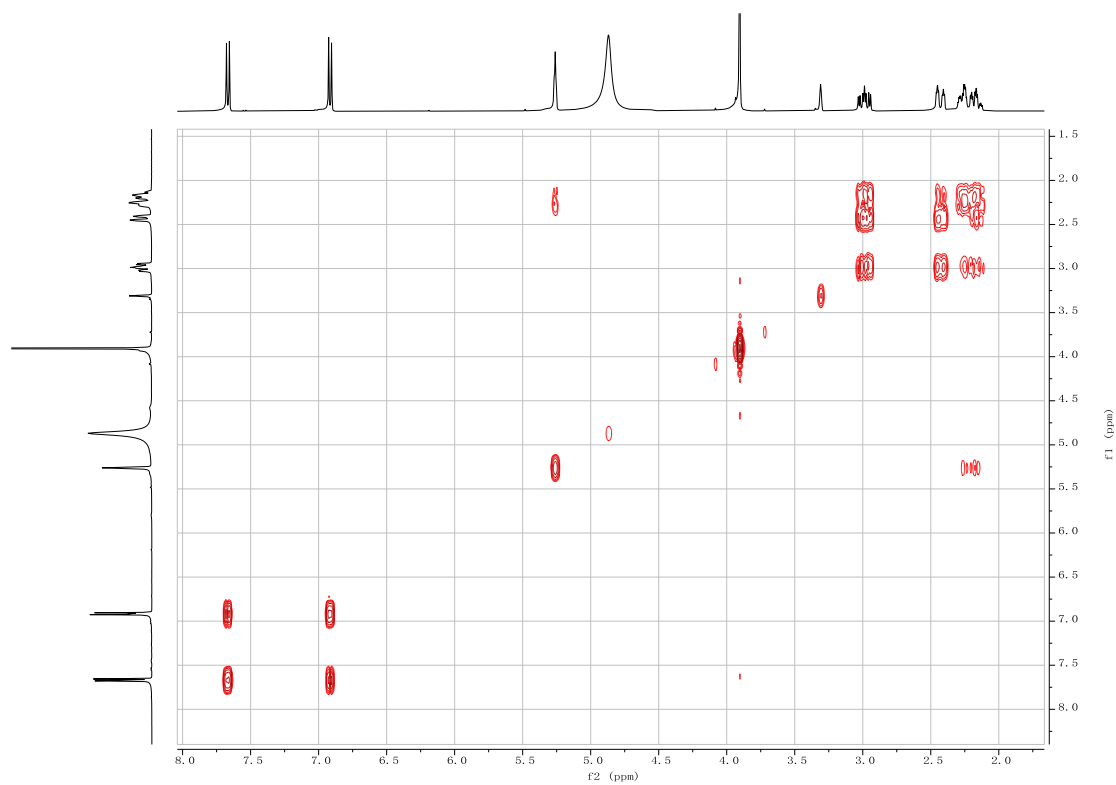

**Figure S34.**  $^1\text{H}$ - $^1\text{H}$  COSY spectrum of compound **7**.

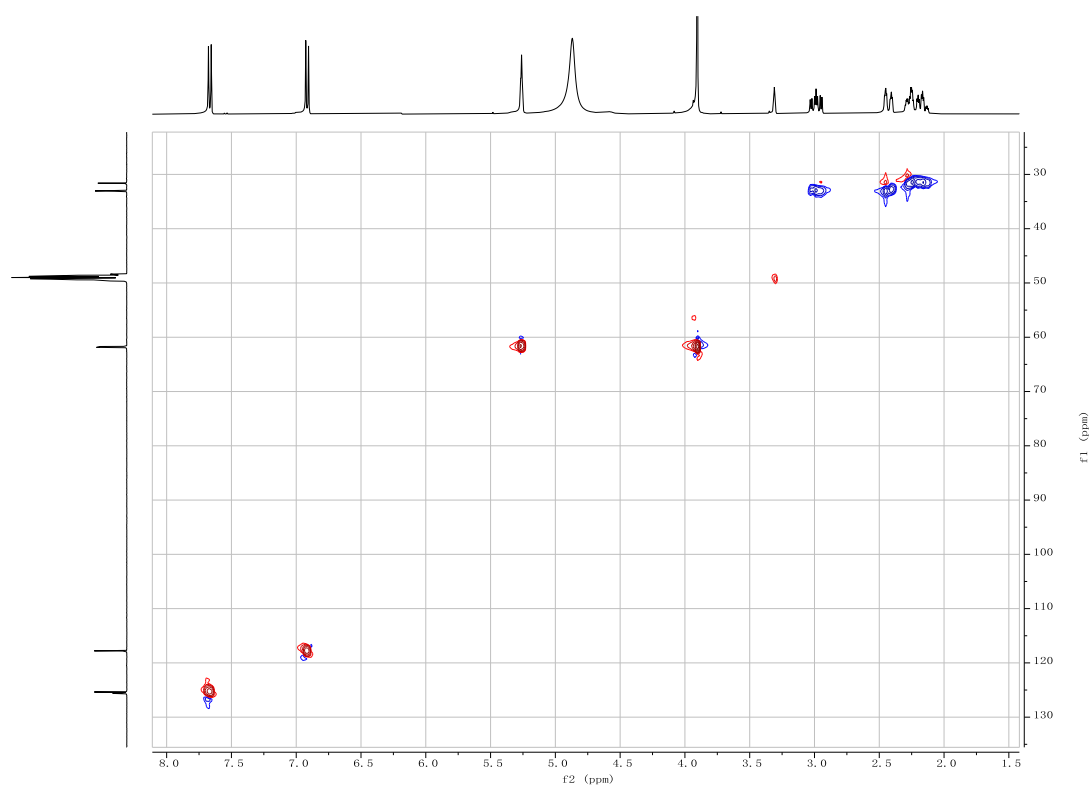

**Figure S35.** HSQC spectrum of compound **7**.

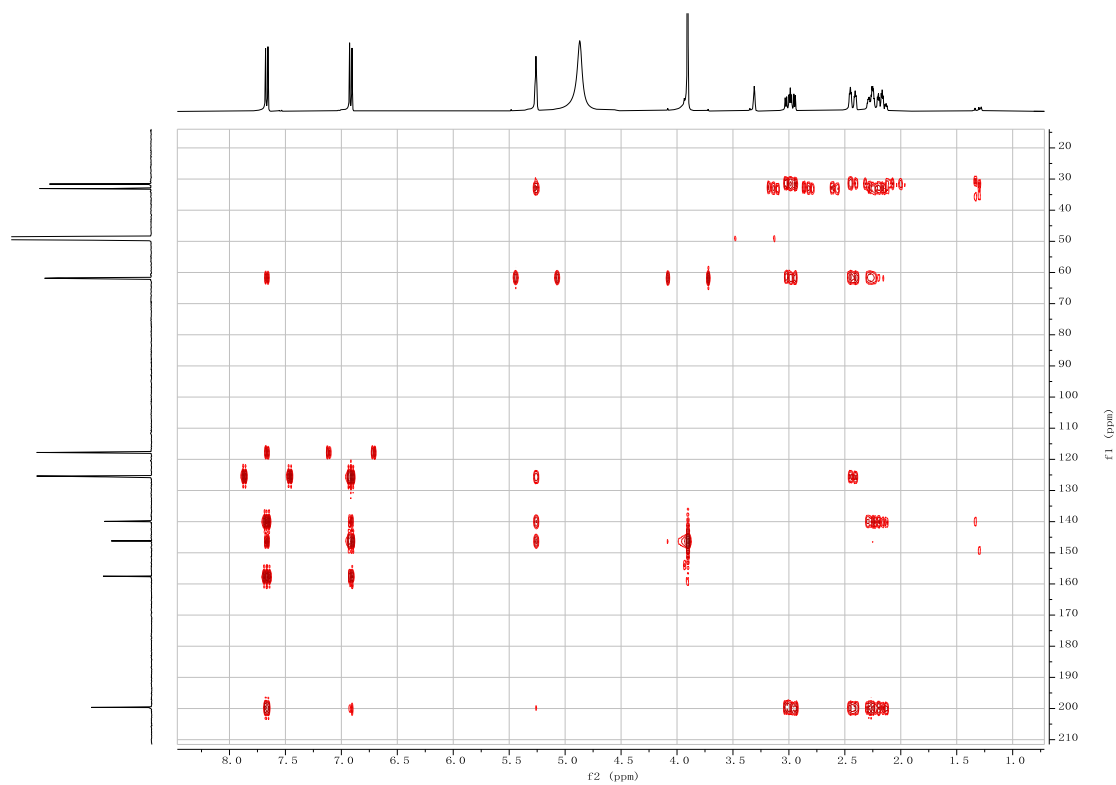

**Figure S36.** HMBC spectrum of compound **7**.

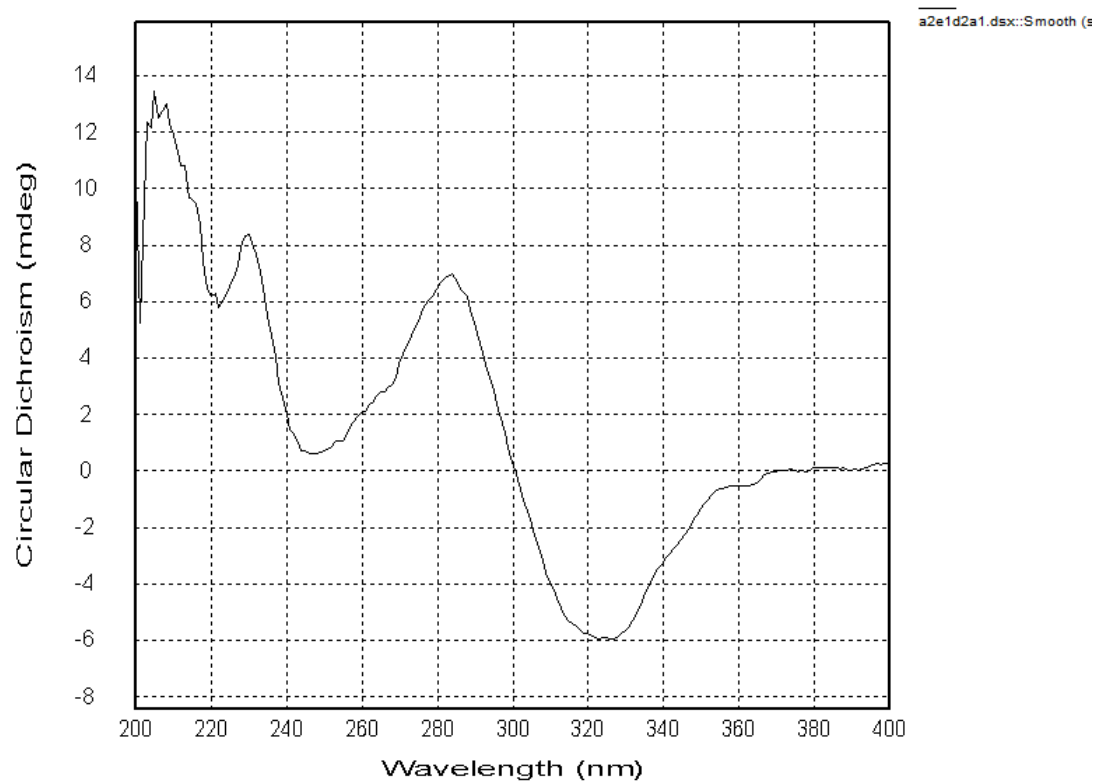

**Figure S37.** ECD spectrum of compound (+)-7.

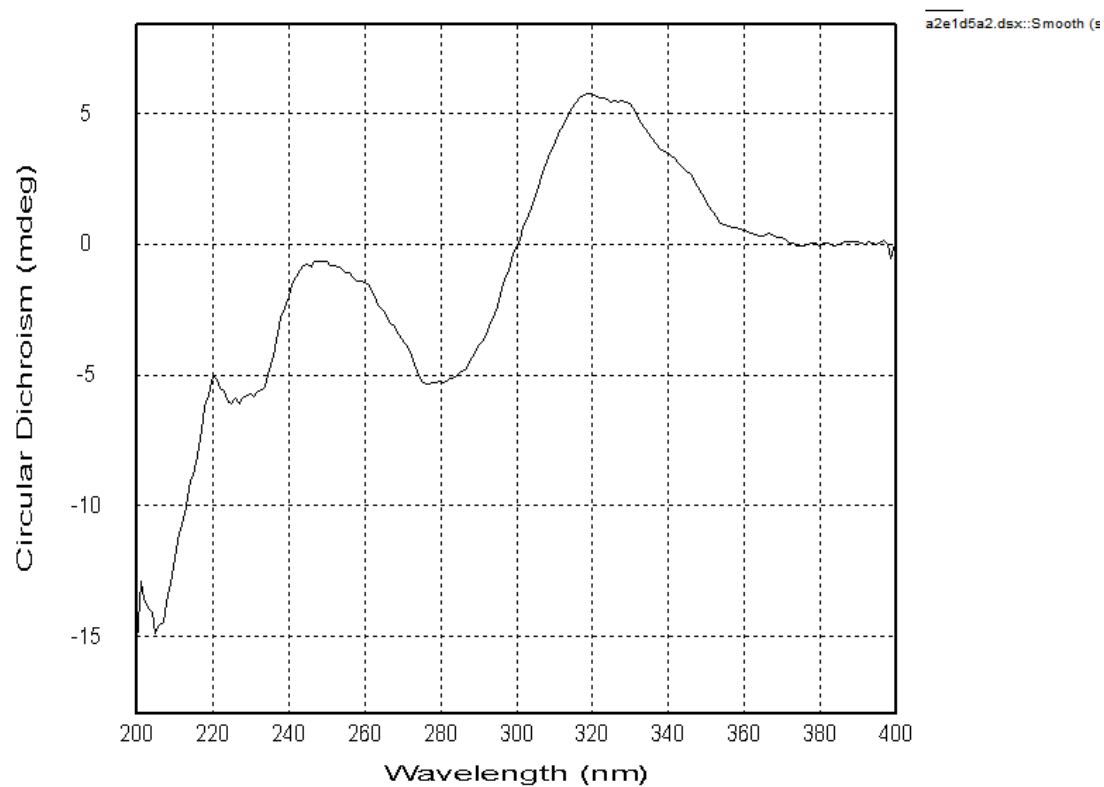

**Figure S38.** ECD spectrum of compound (-)-7.

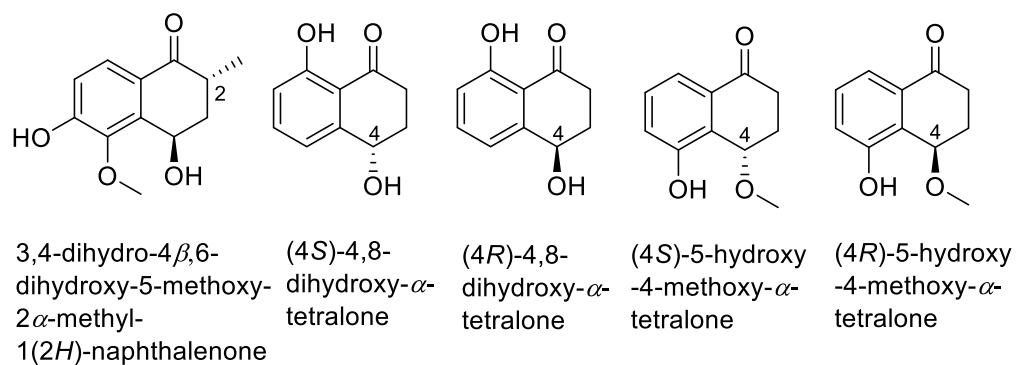

**Figure S39.** Structure of compounds

3,4-dihydro-4 $\beta$ ,6-dihydroxy-5-methoxy-2 $\alpha$ -methyl-1(2*H*)-naphthalenone,  
 (4*S*)-4,8-dihydroxy- $\alpha$ -tetralone, (4*R*)-4,8-dihydroxy- $\alpha$ -tetralone,  
 (4*S*)-5-hydroxy-4-methoxy- $\alpha$ -tetralone and (4*R*)-5-hydroxy-4-methoxy- $\alpha$ -tetralone.
